# Supplementary material for: Who’s behind that mask and cape? The Asian leopard cat’s Agouti (ASIP) allele likely affects coat colour phenotype in the Bengal cat breed
Source: PubMed Central journal article supplement — Anim Genet. 2014 Aug 20;45(6):893–7. doi: 10.1111/age.12206 (PMC4211939; doi:10.1111/age.12206), 2014-08-20
Supplement: NIHMS618548-supplement-Supp_Table___FigureS1-S3.pdf [file NIHMS618548-supplement-Supp_Table___FigureS1-S3.pdf]

```

+-----+-----+-----+-----+-----+-----+
Domestic (A) L N K K S K K I S R K E A E K K R S
CTGAACAAGAAATCCAAAAAGATCAGCAGAAAAGAGGCGGAAAAGAAGAGATCT
Domestic (a) A E Q E I Q K D Q Q K R G G K E E I
CTGAACAAGAAATCCAAAAAGATCAGCAGAAAAGAGGCGGAAAAGAAGAGATCT
Leopard Cat (APbe) L N K K S K K I S R K E A E K K R S
CTGAACAAGAAATCCAAAAAGATCAGCAGAAAAGAGGCGGAAAAGAAGAGATCT
Serval (ALse) L N K K S K K I S R K E A E K K R S
CTGAACAAGAAATCCAAAAAGATCAGCAGAAAAGAGGCGGAAAAGAAGAGATCT

```

217 270

```

+-----+-----+-----+-----+-----+-----+
Domestic (A) S K K K A S M K N V A Q P R R P R P
TCCAAGAAAAAGGCTTCGATGAAGAATGTTGCTCAGCCTCGGCGGCCCGGCCT
Domestic (a) F Q E K G F D E E C C S A S A A P A
TCCAAGAAAAAGGCTTCGATGAAGAATGTTGCTCAGCCTCGGCGGCCCGGCCT
Leopard Cat (APbe) S K K K A S M K N V A R P R R P R P
TCCAAGAAAAAGGCTTCGATGAAGAACGTTGCTCGGCCTCGGCGGCCCGGCCT
Serval (ALse) S K K K A S M K N V A R P R R P R P
TCCAAGAAAAAGGCTTCGATGAAGAATGTTGCTCGGCCTCGGCGGCCCGGCCT

```

271 324

```

+-----+-----+-----+-----+-----+-----+
Domestic (A) P P P A P C V A T R D S C K P P A P
CCGCCGCCCGCCCCCTGCGTGGCCACTCGTGACAGCTGCAAGCCGCCGGCGCCC
Domestic (a) S A A R P L R G H S X
CCGCCGCCCGCCCCCTGCGTGGCCACTCGTGACAGCTGCAAGCCGCCGGCGCCC
Leopard Cat P P P A P C V A T R G S C K P P A P
CCGCCGCCCGCCCCCTGCGTGGCCACTCGAGGCAGCTGCAAGCCGCCGGCGCCC
Serval (ALse) P P P A P C V A T R D S C K P P A P
CCGCCGCCCGCCCCCTGCGTGGCCACTCGTGACAGCTGCAAGCCGCCGGCGCCC

```

325 378

```

+-----+-----+-----+-----+-----+-----+
Domestic (A) A C C D P C A S C Q C R F F R S S C
GCCTGCTGCGACCCGTGCGCCTCCTGCCAGTGCCGCTTCTTCCGCAGCTCCTGC
Domestic (a) GCCTGCTGCGACCCGTGCGCCTCCTGCCAGTGCCGCTTCTTCCGCAGCTCCTGC
A C C D P C A S C Q C R F F R S S C
Leopard Cat (APbe) GCCTGCTGCGACCCGTGCGCCTCCTGCCAGTGCCGCTTCTTCCGCAGCTCCTGC
A C C D P C A S C Q C R F F R S S C
Serval (ALse) GCCTGCTGCGACCCGTGCGCCTCCTGCCAGTGCCGCTTCTTCCGCAGCTCCTGC
A C C D P C A S C Q C R F F R S S C

```

379 408

```

+-----+-----+-----+
Domestic (A) S C R V L N P T C X
TCCTGCCGAGTGCTCAACCCACCTGCTGA
Domestic (a) TCCTGCCGAGTGCTCAACCCACCTGCTGA
S C R V L N P T C X
Leopard Cat (APbe) TCCTGCCGAGTGCTCAACCCACATGCTGA
S C R V L N P T C X
Serval (ALse) TCCTGCCGAGTGCTCAACCCACCTGCTGA
S C R V L N P T C X

```

Table S1. *ASIP* genotypes of individual cats.

| N                                                  | Sample     | Reported Breed or Species   | Declared Phenotype      | Alleles           | Intron 1   |                  | Exon 2  |          |                   |     |          |           |           |                 |           |                |           |
|----------------------------------------------------|------------|-----------------------------|-------------------------|-------------------|------------|------------------|---------|----------|-------------------|-----|----------|-----------|-----------|-----------------|-----------|----------------|-----------|
|                                                    |            |                             |                         |                   | c.1-25 C>T | c.1-16_1-17 insC | c.8T >C | c.12 C>T | c.41G >C C14S C>T |     | c.63 C>T | c.110 G>A | c.111 G>A | c.123_124d elCA | c.127 A>G | c.142 T>C S48P | c.150 C>T |
| <b>Wild felids</b>                                 |            |                             |                         |                   |            |                  |         |          |                   |     |          |           |           |                 |           |                |           |
| 1                                                  | Pbe 13     | <i>Prionailurus b. ber.</i> | Spotted tabby           | $A^{Pbe} A^{Pbe}$ | T/T        | -/-              | T/T     | C/C      | C/C               | C/C | G/G      | G/G       | -/-       | A/A             | C/C       | C/C            | T/T       |
| 2                                                  | Pbe 14     | <i>Prionailurus b. ber.</i> | Spotted tabby           | $A^{Pbe} A^{Pbe}$ | C/C        | -/-              | T/T     | C/C      | C/C               | C/C | G/G      | G/G       | -/-       | A/A             | C/C       | C/C            | T/T       |
| 3                                                  | Pbe 44     | <i>Prionailurus b. ber.</i> | Spotted tabby           | $A^{Pbe} A^{Pbe}$ | C/C        | -/-              | T/T     | C/C      | C/C               | C/C | G/G      | G/G       | -/-       | A/A             | C/C       | C/C            | T/T       |
| 4                                                  | Pbe 78     | <i>Prionailurus b. ber.</i> | Spotted tabby           | $A^{Pbe} A^{Pbe}$ | T/T        | -/-              | T/T     | C/C      | C/C               | C/C | G/G      | G/G       | -/-       | A/A             | C/C       | C/C            | T/T       |
| 5                                                  | A44041     | <i>Prionailurus b. ber.</i> | Spotted tabby           | $A^{Pbe} A^{Pbe}$ |            |                  |         |          | C/C               | C/C | G/G      | G/G       | -/-       | A/A             | C/C       | C/C            | T/T       |
| 6                                                  | Pbe 30     | <i>P.b. euphilura</i>       | Spotted tabby           | $A^{Pbe} A^{Pbe}$ | C/C        | -/-              | T/T     | C/C      | C/C               | C/C | G/G      | G/G       | -/-       | A/A             | C/C       | C/C            | T/T       |
| 7                                                  | Pbe 31     | <i>P.b. euphilura</i>       | Spotted tabby           | $A^{Pbe} A^{Pbe}$ | C/C        | -/-              | T/T     | C/C      | C/C               | C/C | G/G      | G/G       | -/-       | A/A             | C/C       | C/C            | T/T       |
| 8                                                  | Pbe 32     | <i>P.b. euphilura</i>       | Spotted tabby           | $A^{Pbe} A^{Pbe}$ | C/C        | -/-              | T/T     | C/C      | C/C               | C/C | G/G      | G/G       | -/-       | A/A             | C/C       | C/C            | T/T       |
| 9                                                  | Pbe 53     | <i>P.b. euphilura</i>       | Spotted tabby           | $A^{Pbe} A^{Pbe}$ | C/C        | -/-              | T/T     | C/C      | C/C               | C/C | G/G      | G/G       | -/-       | A/A             | C/C       | C/C            | T/T       |
| 10                                                 | Pbe 54     | <i>P.b. euphilura</i>       | Spotted tabby           | $A^{Pbe} A^{Pbe}$ | C/C        | -/-              | T/T     | C/C      | C/C               | C/C | G/G      | G/G       | -/-       | A/A             | C/C       | C/C            | T/T       |
| 11                                                 | Pbe 55     | <i>P.b. euphilura</i>       | Spotted tabby           | $A^{Pbe} A^{Pbe}$ | C/C        | -/-              | T/T     | C/C      | C/C               | C/C | G/G      | G/G       | -/-       | A/A             | C/C       | C/C            | T/T       |
| 12                                                 | CAT24897   | <i>Leptailurus serval</i>   | Spotted tabby           | $A^{Lse} A^{Lse}$ |            | +/+              | T/T     | C/C      | C/C               | T/T | G/G      | G/G       | -/-       | A/A             | C/C       | C/C            | T/T       |
| 13                                                 | CAT42657   | <i>Leptailurus serval</i>   | Spotted tabby           | $A^{Lse} A^{Lse}$ |            | +/+              | T/T     | C/C      | C/C               | C/T | G/G      | G/G       | -/-       | A/A             | C/C       | C/T            | T/T       |
| 14                                                 | Fcat 10462 | <i>Leptailurus serval</i>   |                         | $A^{Lse} A^{Lse}$ |            |                  | T/T     | C/C      | C/C               | C/T | G/G      | G/G       | -/-       | A/A             | C/C       | C/T            | T/T       |
| 15                                                 | Fcat 15243 | <i>Leptailurus serval</i>   |                         | $A^{Lse} A^{Lse}$ |            |                  | T/T     | C/C      | C/C               | C/T | G/G      | G/G       | -/-       | A/A             | C/C       | C/T            | T/T       |
| 16                                                 | Texas      | <i>Leptailurus serval</i>   |                         | $A^{Lse} A^{Lse}$ |            | +/+              | T/T     | C/C      | C/C               | C/C | G/G      | G/G       | -/-       | A/A             | C/C       | C/C            | T/T       |
| 17                                                 | Fcat 6817  | <i>Felis chaus</i>          |                         | $A^{rch} A^{rch}$ |            |                  | C/C     | T/T      | C/C               | C/C | A/A      | G/G       | -/-       | A/A             | T/T       | C/C            | T/T       |
| 18                                                 | Fcat 6818  | <i>Felis chaus</i>          |                         | $A^{rch} A^{rch}$ |            |                  | C/C     | T/T      | C/C               | C/C | A/A      | G/G       | -/-       | A/A             | T/T       | C/C            | T/T       |
| <b>Other Pedigree Cats and Domestic Shorthairs</b> |            |                             |                         |                   |            |                  |         |          |                   |     |          |           |           |                 |           |                |           |
| 19                                                 | Fcat 4406  | Domestic Shorthair          | Tabby                   | Aa                | C/C        | -/-              | T/T     | C/C      | G/G               | C/C | G/G      | G/G       | +/-       | A/A             | T/T       | C/C            | T/T       |
| 20                                                 | Fcat 16833 | Domestic Shorthair          | Tabby                   | Aa                | C/C        | -/-              | T/T     | C/C      | G/G               | C/C | G/G      | G/G       | +/-       | A/A             | T/T       | C/C            | T/T       |
| 21                                                 | Fcat 15331 | Domestic Shorthair          | Black solid             | aa                | C/C        | -/-              | T/T     | C/C      | G/G               | C/C | G/G      | G/G       | +/+       | A/A             | T/T       | C/C            | T/T       |
| 22                                                 | A52064     | British Shorthair           | Tabby                   | Aa                |            |                  |         |          | G/G               | C/C | G/G      | G/G       | +/-       | A/A             | T/T       | C/C            | T/T       |
| 23                                                 | A52401     | Siamese                     | Solid                   | aa                |            |                  |         |          | G/G               | C/C | G/G      | G/G       | +/+       | A/A             | T/T       | C/C            | T/T       |
| 24                                                 | A52444     | Australian Mist             | Tabby                   | AA                |            |                  |         |          | G/G               | C/C | G/G      | G/G       | -/-       | A/A             | T/T       | C/C            | T/T       |
| <b>Bengals - Charcoal</b>                          |            |                             |                         |                   |            |                  |         |          |                   |     |          |           |           |                 |           |                |           |
| 25                                                 | A65330     | Bengal                      | Blue Rosetted Charcoal  | $A^{Pbe} a$       |            |                  |         |          | G/C               | C/C | G/G      | G/G       | +/-       | A/A             | T/C       | C/C            | T/T       |
| 26                                                 | G00587     | Bengal                      | Brown Charcoal          | $A^{Pbe} a$       |            |                  |         |          | G/C               | C/C | G/G      | G/G       | +/-       | A/A             | T/C       | C/C            | T/T       |
| 27                                                 | A65236     | Bengal                      | Brown Charcoal Marbled  | $A^{Pbe} a$       |            |                  |         |          | G/C               | C/C | G/G      | G/G       | +/-       | A/A             | T/C       | C/C            | T/T       |
| 28                                                 | A65586     | Bengal                      | Brown Charcoal Marbled  | $A^{Pbe} a$       |            |                  |         |          | G/C               | C/C | G/G      | G/G       | +/-       | A/A             | T/C       | C/C            | T/T       |
| 29                                                 | A65233     | Bengal                      | Brown Charcoal Rosetted | $A^{Pbe} a$       |            |                  |         |          | G/C               | C/C | G/G      | G/G       | +/-       | A/A             | T/C       | C/C            | T/T       |
| 30                                                 | A65234     | Bengal                      | Brown Charcoal Rosetted | $A^{Pbe} a$       |            |                  |         |          | G/C               | C/C | G/G      | G/G       | +/-       | A/A             | T/C       | C/C            | T/T       |
| 31                                                 | A65366     | Bengal                      | Brown Charcoal Rosetted | $A^{Pbe} a$       |            |                  |         |          | G/C               | C/C | G/G      | G/G       | +/-       | A/A             | T/C       | C/C            | T/T       |
| 32                                                 | A65864     | Bengal                      | Brown Charcoal Rosetted | $A^{Pbe} a$       |            |                  |         |          | G/C               | C/C | G/G      | G/G       | +/-       | A/A             | T/C       | C/C            | T/T       |

|    |            |        |                                |                    |     |     |     |     |     |     |     |     |     |     |     |     |     |
|----|------------|--------|--------------------------------|--------------------|-----|-----|-----|-----|-----|-----|-----|-----|-----|-----|-----|-----|-----|
| 33 | A64108     | Bengal | Mink Rosetted Charcoal         | A <sup>lbe</sup> a |     |     |     | G/C | C/C | G/G | G/G | +/- | A/A | T/C | C/C | T/T |     |
| 34 | A63021     | Bengal | Silver Charcoal                | A <sup>lbe</sup> a |     |     |     | G/C | C/C | G/G | G/G | +/- | A/A | T/C | C/C | T/T |     |
| 35 | A65863     | Bengal | Silver Charcoal Rosetted       | A <sup>lbe</sup> a |     |     |     | G/C | C/C | G/G | G/G | +/- | A/A | T/C | C/C | T/T |     |
| 36 | A65644     | Bengal | Silver Rosetted Charcoal       | A <sup>lbe</sup> a |     |     |     | G/C | C/C | G/G | G/G | +/- | A/A | T/C | C/C | T/T |     |
| 37 | CAT 20554  | Bengal | Charcoal                       | A <sup>Pbe</sup> a | C/C | -/- | T/T | C/C | G/C | C/C | G/G | G/G | +/- | A/A | T/C | C/C | T/T |
| 38 | CAT 21530  | Bengal | Brown spotted tabby (charcoal) | A <sup>lbe</sup> a | C/C | -/- | T/T | C/C | G/C | C/C | G/G | G/G | +/- | A/A | T/C | C/C | T/T |
| 39 | CAT 32049  | Bengal | Charcoal Brown spotted tabby   | A <sup>lbe</sup> a | C/C | -/- | T/T | C/C | G/C | C/C | G/G | G/G | +/- | A/A | T/C | C/C | T/T |
| 40 | CAT 32559  | Bengal | Brown spotted charcoal         | A <sup>lbe</sup> a | C/C | -/- | T/T | C/C | G/C | C/C | G/G | G/G | +/- | A/A | T/C | C/C | T/T |
| 41 | CAT 40090  | Bengal | Brown spotted charcoal         | A <sup>lbe</sup> a | C/C | -/- | T/T | C/C | G/C | C/C | G/G | G/G | +/- | A/A | T/C | C/C | T/T |
| 42 | CAT 40715  | Bengal | Brown spotted tabby (charcoal) | A <sup>lbe</sup> a | C/C | -/- | T/T | C/C | G/C | C/C | G/G | G/G | +/- | A/A | T/C | C/C | T/T |
| 43 | CAT 41680  | Bengal | Silver Spotted charcoal        | A <sup>lbe</sup> a | C/C | -/- | T/T | C/C | G/C | C/C | G/G | G/G | +/- | A/A | T/C | C/C | T/T |
| 44 | CAT 42628  | Bengal | Charcoal Brown spotted tabby   | A <sup>lbe</sup> a | C/C | -/- | T/T | C/C | G/C | C/C | G/G | G/G | +/- | A/A | T/C | C/C | T/T |
| 45 | CAT 43263  | Bengal | Silver charcoal                | A <sup>lbe</sup> a | C/C | -/- | T/T | C/C | G/C | C/C | G/G | G/G | +/- | A/A | T/C | C/C | T/T |
| 46 | CAT 44415  | Bengal | Seal lynx point charcoal       | A <sup>lbe</sup> a | C/C | -/- | T/T | C/C | G/C | C/C | G/G | G/G | +/- | A/A | T/C | C/C | T/T |
| 47 | CAT 44885  | Bengal | Silver Spotted charcoal        | A <sup>lbe</sup> a | C/C | -/- | T/T | C/C | G/C | C/C | G/G | G/G | +/- | A/A | T/C | C/C | T/T |
| 48 | CAT 47111  | Bengal | Brown spotted charcoal         | A <sup>lbe</sup> a | C/C | -/- | T/T | C/C | G/C | C/C | G/G | G/G | +/- | A/A | T/C | C/C | T/T |
| 49 | CAT 47147  | Bengal | Brown charcoal                 | A <sup>lbe</sup> a | C/C | -/- | T/T | C/C | G/C | C/C | G/G | G/G | +/- | A/A | T/C | C/C | T/T |
| 50 | CAT 47643  | Bengal | Black/silver charcoal marble   | A <sup>lbe</sup> a | C/C | -/- | T/T | C/C | G/C | C/C | G/G | G/G | +/- | A/A | T/C | C/C | T/T |
| 51 | CAT 47730  | Bengal | Charcoal                       | A <sup>lbe</sup> a | C/C | -/- | T/T | C/C | G/C | C/C | G/G | G/G | +/- | A/A | T/C | C/C | T/T |
| 52 | CAT 47734  | Bengal | Charcoal                       | A <sup>lbe</sup> a | C/C | -/- | T/T | C/C | G/C | C/C | G/G | G/G | +/- | A/A | T/C | C/C | T/T |
| 53 | CAT 48987  | Bengal | Seal lynx point charcoal       | A <sup>lbe</sup> a | C/C | -/- | T/T | C/C | G/C | C/C | G/G | G/G | +/- | A/A | T/C | C/C | T/T |
| 54 | CAT 48988  | Bengal | Brown spotted charcoal         | A <sup>lbe</sup> a | C/C | -/- | T/T | C/C | G/C | C/C | G/G | G/G | +/- | A/A | T/C | C/C | T/T |
| 55 | CAT 49056  | Bengal | Brown spotted tabby (charcoal) | A <sup>lbe</sup> a | C/C | -/- | T/T | C/C | G/C | C/C | G/G | G/G | +/- | A/A | T/C | C/C | T/T |
| 56 | CAT 49166  | Bengal | Seal Lynx point charcoal       | A <sup>lbe</sup> a | C/C | -/- | T/T | C/C | G/C | C/C | G/G | G/G | +/- | A/A | T/C | C/C | T/T |
| 57 | CAT 49515  | Bengal | Charcoal silver                | A <sup>lbe</sup> a | C/C | -/- | T/T | C/C | G/C | C/C | G/G | G/G | +/- | A/A | T/C | C/C | T/T |
| 58 | CAT 49628  | Bengal | Charcoal silver spotted        | A <sup>lbe</sup> a | C/C | -/- | T/T | C/C | G/C | C/C | G/G | G/G | +/- | A/A | T/C | C/C | T/T |
| 59 | CAT 50152  | Bengal | Charcoal                       | A <sup>lbe</sup> a | C/C | -/- | T/T | C/C | G/C | C/C | G/G | G/G | +/- | A/A | T/C | C/C | T/T |
| 60 | CAT 50639  | Bengal | Black spotted charcoal         | A <sup>lbe</sup> a | C/C | -/- | T/T | C/C | G/C | C/C | G/G | G/G | +/- | A/A | T/C | C/C | T/T |
| 61 | CAT 50920  | Bengal | Silver charcoal spotted        | A <sup>lbe</sup> a | C/C | -/- | T/T | C/C | G/C | C/C | G/G | G/G | +/- | A/A | T/C | C/C | T/T |
| 62 | CAT 51702  | Bengal | Silver spotted charcoal        | A <sup>lbe</sup> a | C/C | -/- | T/T | C/C | G/C | C/C | G/G | G/G | +/- | A/A | T/C | C/C | T/T |
| 63 | Fcat 11790 | Bengal | Silver charcoal                | A <sup>lbe</sup> a | C/C | -/- | T/T | C/C | G/C | C/C | G/G | G/G | +/- | A/A | T/C | C/C | T/T |
| 64 | Fcat 15654 | Bengal | Brown charcoal silver          | A <sup>lbe</sup> a | C/C | -/- | T/T | C/C | G/C | C/C | G/G | G/G | +/- | A/A | T/C | C/C | T/T |
| 65 | Fcat 16099 | Bengal | Black silver spotted charcoal  | A <sup>lbe</sup> a | C/C | -/- | T/T | C/C | G/C | C/C | G/G | G/G | +/- | A/A | T/C | C/C | T/T |
| 66 | Fcat 16104 | Bengal | Black silver spotted charcoal  | A <sup>lbe</sup> a | C/C | -/- | T/T | C/C | G/C | C/C | G/G | G/G | +/- | A/A | T/C | C/C | T/T |
| 67 | Fcat 17808 | Bengal | Charcoal silver                | A <sup>lbe</sup> a | C/C | -/- | T/T | C/C | G/C | C/C | G/G | G/G | +/- | A/A | T/C | C/C | T/T |
| 68 | Fcat 17809 | Bengal | Charcoal snow                  | A <sup>lbe</sup> a | C/C | -/- | T/T | C/C | G/C | C/C | G/G | G/G | +/- | A/A | T/C | C/C | T/T |
| 69 | Fcat 17811 | Bengal | Very dark Charcoal             | A <sup>lbe</sup> a | C/C | -/- | T/T | C/C | G/C | C/C | G/G | G/G | +/- | A/A | T/C | C/C | T/T |
| 70 | Fcat 17817 | Bengal | Brown charcoal                 | A <sup>lbe</sup> a | C/C | -/- | T/T | C/C | G/C | C/C | G/G | G/G | +/- | A/A | T/C | C/C | T/T |
| 71 | Fcat 17818 | Bengal | Charcoal                       | A <sup>lbe</sup> a | C/C | -/- | T/T | C/C | G/C | C/C | G/G | G/G | +/- | A/A | T/C | C/C | T/T |
| 72 | Fcat 17901 | Bengal | Charcoal                       | A <sup>lbe</sup> a | C/C | -/- | T/T | C/C | G/C | C/C | G/G | G/G | +/- | A/A | T/C | C/C | T/T |
| 73 | Fcat 17902 | Bengal | Charcoal                       | A <sup>lbe</sup> a | C/C | -/- | T/T | C/C | G/C | C/C | G/G | G/G | +/- | A/A | T/C | C/C | T/T |
| 74 | Fcat 17905 | Bengal | Brown charcoal                 | A <sup>lbe</sup> a | C/C | -/- | T/T | C/C | G/C | C/C | G/G | G/G | +/- | A/A | T/C | C/C | T/T |
| 75 | Fcat 17906 | Bengal | Mink Charcoal                  | A <sup>lbe</sup> a | C/C | -/- | T/T | C/C | G/C | C/C | G/G | G/G | +/- | A/A | T/C | C/C | T/T |
| 76 | Fcat 17907 | Bengal | Sepia Charcoal                 | A <sup>lbe</sup> a | C/C | -/- | T/T | C/C | G/C | C/C | G/G | G/G | +/- | A/A | T/C | C/C | T/T |
| 77 | TX3        | Bengal | Charcoal                       | A <sup>lbe</sup> a | C/C | -/- | T/T | C/C | G/C | C/C | G/G | G/G | +/- | A/A | T/C | C/C | T/T |
| 78 | TX11       | Bengal | Charcoal                       | A <sup>lbe</sup> a | C/C | -/- | T/T | C/C | G/C | C/C | G/G | G/G | +/- | A/A | T/C | C/C | T/T |

|    |               |        |                              |                         |     |     |     |     |     |     |     |     |     |     |     |     |     |
|----|---------------|--------|------------------------------|-------------------------|-----|-----|-----|-----|-----|-----|-----|-----|-----|-----|-----|-----|-----|
| 79 | TX12          | Bengal | Charcoal                     | $A^{l^{be}} a$          | C/C | -/- | T/T | C/C | G/C | C/C | G/G | G/G | +/- | A/A | T/C | C/C | T/T |
| 80 | CAT 50679     | Bengal | Brown charcoal spotted       | $A^{l^{be}} a$          | C/C | -/- | T/T | C/C | G/C | C/C | G/G | G/G | +/- | A/A | T/C | C/C | T/T |
| 81 | A65584*       | Bengal | Light Charcoal               | $A^{l^{be}} A^{l^{be}}$ |     |     |     |     | C/C | C/C | G/G | G/G | -/- | A/A | C/C | C/C | T/T |
| 82 | CAT 33143*    | Bengal | Silver Charcoal              | Aa                      | C/C | -/- | T/T | C/C | G/G | C/C | G/G | G/G | +/- | A/A | T/T | C/C | T/T |
| 83 | CAT 39839*    | Bengal | Silver Charcoal              | Aa                      | C/C | -/- | T/T | C/C | G/G | C/C | G/G | G/G | +/- | A/A | T/T | C/C | T/T |
| 84 | CAT 44649*    | Bengal | Charcoal Brown spotted       | Aa                      | C/C | -/- | T/T | C/C | G/G | C/C | G/G | G/G | +/- | A/A | T/T | C/C | T/T |
| 85 | CAT 44650*    | Bengal | Charcoal Brown spotted       | Aa                      | C/C | -/- | T/T | C/C | G/G | C/C | G/G | G/G | +/- | A/A | T/T | C/C | T/T |
| 86 | Fcat 17812* # | Bengal | Charcoal Silver              | $A^{l^{be}} A^{l^{be}}$ | C/C | -/- | T/T | C/C | C/C | C/C | G/G | G/G | -/- | A/A | C/C | C/C | T/T |
| 87 | CAT 49057*    | Bengal | Brown spotted tabby charcoal | $A^{l^{de}} A^{l^{de}}$ | C/C | -/- | T/T | C/C | C/C | C/C | G/G | G/G | -/- | A/A | C/C | C/C | T/T |
| 88 | Fcat 16869* # | Bengal | Charcoal                     | $A^{l^{be}} A$          | C/C | -/- | T/T | C/C | G/C | C/C | G/G | G/G | -/- | A/A | T/C | C/C | T/T |

#### Bengals - unknown phenotype

|    |            |        |         |     |     |     |     |     |     |     |     |     |     |     |     |     |     |
|----|------------|--------|---------|-----|-----|-----|-----|-----|-----|-----|-----|-----|-----|-----|-----|-----|-----|
| 89 | A65882     | Bengal | unknown | Aa  |     |     |     |     | G/G |     |     |     | +/- |     | T/T |     |     |
| 90 | Fcat 13630 | Bengal | unknown | AA  | C/C | -/- | T/T | C/C | G/G | C/C | G/G | G/G | -/- | A/A | T/T | C/C | T/T |
| 91 | Fcat 16049 | Bengal | unknown | AA  | C/C | -/- | T/T | C/C | G/G | C/C | G/G | G/G | -/- | A/A | T/T | C/C | T/T |
| 92 | CAT26944   | Bengal | unknown | AA2 |     | -/- |     |     | G/C |     |     |     | -/- |     | T/T |     |     |
| 93 | CAT58292   | Bengal | unknown | AA2 |     | -/- | T/T | C/C | G/C | C/C | G/A | G/A | -/- | A/G | T/T | C/C | T/A |
| 94 | Fcat 9590  | Bengal | unknown | AA  | C/C | -/- | T/T | C/C | G/G | C/C | G/G | G/G | -/- | A/A | T/T | C/C | T/T |

#### Bengals - Non-charcoal

|     |          |        |                      |     |  |     |     |     |     |     |     |     |     |     |     |     |     |
|-----|----------|--------|----------------------|-----|--|-----|-----|-----|-----|-----|-----|-----|-----|-----|-----|-----|-----|
| 95  | A65235   | Bengal | Silver Rosetted      | aA2 |  |     |     |     | G/C | C/C | G/A | G/A | +/- | A/G | T/T | C/C | T/A |
| 96  | A65861   | Bengal | Silver Rosetted      | aA2 |  |     |     |     | G/C | C/C | G/A | G/A | +/- | A/G | T/T | C/C | T/A |
| 97  | A65862   | Bengal | Silver Rosetted      | aA2 |  |     |     |     | G/C | C/C | G/A | G/A | +/- | A/G | T/T | C/C | T/A |
| 98  | CAT58200 | Bengal | Brown spotted tabby  | aA2 |  | -/- | T/T | C/C | G/C | C/C | G/A | G/A | +/- | A/G | T/T | C/C | T/A |
| 99  | CAT59813 | Bengal | Silver spotted tabby | aA2 |  | -/- | T/T | C/C | G/C | C/C | G/A | G/A | +/- | A/G | T/T | C/C | T/A |
| 100 | A65588   | Bengal | Black                | aa  |  |     |     |     | G/G | C/C | G/G | G/G | +/+ | A/A | T/T | C/C | T/T |
| 101 | A64110   | Bengal | Solid Mink Rosetted  | aa  |  |     |     |     | G/G | C/C | G/G | G/G | +/+ | A/A | T/T | C/C | T/T |
| 102 | A63614   | Bengal | Brown                | Aa  |  |     |     |     | G/G |     |     |     | +/- | A/A | T/T |     |     |
| 103 | A65476   | Bengal | Brown                | Aa  |  |     |     |     | G/G |     |     |     | +/- | A/A | T/T |     |     |
| 104 | A65866   | Bengal | Brown Marbled        | Aa  |  |     |     |     | G/G |     |     |     | +/- | A/A | T/T |     |     |
| 105 | A65867   | Bengal | Brown Marbled        | Aa  |  |     |     |     | G/G |     |     |     | +/- | A/A | T/T |     |     |
| 106 | G00209   | Bengal | Brown Marbled Tabby  | Aa  |  |     |     |     | G/G |     |     |     | +/- | A/A | T/T |     |     |
| 107 | A65859   | Bengal | Brown Rosetted       | Aa  |  |     |     |     | G/G |     |     |     | +/- | A/A | T/T |     |     |
| 108 | A64393   | Bengal | Brown Spotted Tabby  | Aa  |  |     |     |     | G/G | C/C | G/G | G/G | +/- | A/A | T/T | C/C | T/T |
| 109 | G00210   | Bengal | Brown Spotted Tabby  | Aa  |  |     |     |     | G/G |     |     |     | +/- | A/A | T/T |     |     |
| 110 | A62141   | Bengal | Silver               | Aa  |  |     |     |     | G/G |     |     |     | +/- | A/A | T/T |     |     |
| 111 | A65473   | Bengal | Silver               | Aa  |  |     |     |     | G/G |     |     |     | +/- | A/A | T/T |     |     |
| 112 | A65475   | Bengal | Silver               | Aa  |  |     |     |     | G/G |     |     |     | +/- | A/A | T/T |     |     |
| 113 | A52638   | Bengal | Snow Marble          | Aa  |  |     |     |     | G/G | C/C | G/G | G/G | +/- | A/A | T/T | C/C | T/T |
| 114 | A65288   | Bengal | Snow Mink            | Aa  |  |     |     |     | G/G |     |     |     | +/- | A/A | T/T |     |     |
| 115 | A63022   | Bengal | Brown Tabby          | AA  |  |     |     |     | G/G |     |     |     | -/- | A/A | T/T |     |     |
| 116 | A65237   | Bengal | Brown Marbled        | AA  |  |     |     |     | G/G |     |     |     | -/- | A/A | T/T |     |     |
| 117 | A65370   | Bengal | Brown Marbled        | AA  |  |     |     |     | G/G |     |     |     | -/- | A/A | T/T |     |     |
| 118 | A64109   | Bengal | Brown Rosetted       | AA  |  |     |     |     | G/G | C/C | G/G | G/G | -/- | A/A | T/T | C/C | T/T |
| 119 | A65367   | Bengal | Brown Rosetted       | AA  |  |     |     |     | G/G |     |     |     | -/- | A/A | T/T |     |     |
| 120 | A65368   | Bengal | Brown Rosetted       | AA  |  |     |     |     | G/G |     |     |     | -/- | A/A | T/T |     |     |
| 121 | A65369   | Bengal | Brown Rosetted       | AA  |  |     |     |     | G/G |     |     |     | -/- | A/A | T/T |     |     |
| 122 | A65371   | Bengal | Brown Rosetted       | AA  |  |     |     |     | G/G |     |     |     | -/- | A/A | T/T |     |     |



|                                 |            |          |                     |                   |     |     |     |     |     |     |     |     |     |     |     |     |     |
|---------------------------------|------------|----------|---------------------|-------------------|-----|-----|-----|-----|-----|-----|-----|-----|-----|-----|-----|-----|-----|
| 164                             | CAT59246   | Bengal   | Brown spotted tabby | AA2               |     |     |     | G/C | G/A | G/A | -/- |     | T/T |     |     |     |     |
| 165                             | A63020     | Bengal   | Silver tabby        | $A^{Pbe} A$       |     |     |     | G/C | C/C | G/G | G/G | -/- | A/A | T/C | C/C | T/T |     |
| 166                             | A65474     | Bengal   | Silver tabby        | $A^{Pbe} A$       |     |     |     | G/C | C/C | G/G | G/G | -/- | A/A | T/C | C/C | T/T |     |
| 167                             | Fcat 17820 | Bengal   | Silver tabby        | $A^{Pbe} A$       | C/C | -/- | T/T | C/C | G/C | C/C | G/G | G/G | -/- | A/A | T/C | C/C | T/T |
| 168                             | Fcat 17899 | Bengal   | Non-charcoal tabby  | $A^{Pbe} A$       | C/C | -/- | T/T | C/C | G/C | C/C | G/G | G/G | -/- | A/A | T/C | C/C | T/T |
| 169                             | Fcat 17903 | Bengal   | Non-charcoal tabby  | $A^{Pbe} A$       | C/C | -/- | T/T | C/C | G/C | C/C | G/G | G/G | -/- | A/A | T/C | C/C | T/T |
| 170                             | Fcat 17904 | Bengal   | Non-charcoal tabby  | $A^{Lde} A$       | C/C | -/- | T/T | C/C | G/C | C/C | G/G | G/G | -/- | A/A | T/C | C/C | T/T |
| 171                             | Fcat 17821 | Bengal   | Non-charcoal tabby  | $A^{Pbe} A^{Lbe}$ | C/C | -/- | T/T | C/C | C/C | C/C | G/G | G/G | -/- | A/A | C/C | C/C | T/T |
| 172                             | TX10       | Bengal   | Non-charcoal tabby  | $A^{Pbe} A^{Lbe}$ | C/C | -/- | T/T | C/C | C/C | C/C | G/G | G/G | -/- | A/A | C/C | C/C | T/T |
| <b>Savannahs - Non-charcoal</b> |            |          |                     |                   |     |     |     |     |     |     |     |     |     |     |     |     |     |
| 173                             | A38482     | Savannah | Spotted tabby       | AA                |     |     |     | G/G | C/C | G/G | G/G | -/- | A/A | T/T | C/C | T/T |     |
| 174                             | A62624     | Savannah | Spotted tabby       | AA                |     |     |     | G/G | C/C | G/G | G/G | -/- | A/A | T/T | C/C | T/T |     |
| 175                             | A63613     | Savannah | Spotted tabby       | AA2               |     |     |     | G/C | C/C | G/A | G/A | -/- | A/G | T/T | C/C | T/A |     |
| 176                             | CAT58461   | Savannah | Spotted tabby       | $A^{Lse} a$       |     |     | T/T | C/C | G/C | C/T | G/G | G/G | +/- | A/A | T/C | C/T | T/T |
| 177                             | CAT58452   | Savannah | Spotted tabby       | $A^{Lse} A^{Lse}$ |     |     | T/T | C/C | C/C | C/C | G/G | G/G | -/- | A/A | C/C | C/C | T/T |
| 178                             | CAT58462   | Savannah | Spotted tabby       | $A^{Lse} a$       |     |     | T/T | C/C | G/C | C/T | G/G | G/G | +/- | A/A | T/C | C/C | T/T |

\* non-concordant

# picture verified non-charcoal phenotype

‡ deleted sequence: CGCCAGCGGGGAGGGGTAGGGCACCCAGCGGGGAAGGGTAGGG







|       |     |      |     |     |     |     |     |     |     |     |     |     |     |     |     |     |     |     |     |     |
|-------|-----|------|-----|-----|-----|-----|-----|-----|-----|-----|-----|-----|-----|-----|-----|-----|-----|-----|-----|-----|
| C/C   | A/G | ?    | A/G | C/C | C/T | +/- | N/A | N/A | N/A | N/A | N/A | A/G |     | C/T | A/G | A/T | A/G | C/C | A/C |     |
| C/C   |     |      | A/G | C/T | C/T | +/- | N/A | N/A | N/A | N/A | N/A | N/A |     |     |     |     |     |     |     |     |
| C/C   | A/A | T/T  | G/G | C/C | T/T | -/- | T/T | C/C | G/G | G/G | -   | G/G | C/C | A/A | T/T | A/A | T/T | A/A | C/T | C/C |
| C/C   | A/A | C/T? | G/G | C/C | T/T | -/- | T/T | C/C | G/G | A/G | -   | G/G | C/C | A/A | T/T | A/A | T/T | A/A | C/C | C/C |
| C/C   | A/A | T/T  | G/G | C/C | T/T | -/- | T/T | C/C | G/G | A/G | -   | G/G | C/C | A/A | T/T | A/A | T/T | A/A | C/C | C/C |
| C/C   | A/A | T/T  | G/G | C/C | T/T | -/- | T/T | C/C | G/G | A/G | -   | G/G | C/C | A/A | T/T | A/A | T/T | A/A | C/C | C/C |
| C/C   | G/G | C/T  | A/A | C/T | C/C | +/+ | C/C | T/T | T/T | G/G | +   | A/A | G/G | A?  | C/C | G/G | A/A | G/G | C/C | A/A |
| C/C   | G/G | C/C  | A/A | C/C | C/C | +/+ | C/C | T/T | T/T | G/G | +   | A/A |     |     |     |     |     |     |     |     |
| C/C   | A/G | T/T  | A/G | C/T | C/T | +/- | N/A | N/A | N/A | N/A | N/A | N/A | C/C | A/A | T/T | A/A | T/T | A/A | T/T | C/C |
| <hr/> |     |      |     |     |     |     |     |     |     |     |     |     |     |     |     |     |     |     |     |     |
| C/C   | A/A | T/T  | G/G | C/C | T/T | -/- | T/T | C/C | G/G | G/G | -   | G/G | C/C | A/A | T/T | A/A | T/T | A/A | T/T | C/C |
| C/C   | A/A | T/T  | G/G | C/C | T/T | -/- | T/T | C/C | G/G | A/G | -   | G/G | ?   | ?   | T/T | A/A | T/T | A/A | C/T | C/C |
| <hr/> |     |      |     |     |     |     |     |     |     |     |     |     |     |     |     |     |     |     |     |     |
| C/C   | A/A | T/T  | G/G | C/C | T/T | -/- | T/T | C/C | G/G | A/G | -   | G/G |     |     | T/T | A/A | T/T | A/A | C/C | C/C |
| <hr/> |     |      |     |     |     |     |     |     |     |     |     |     |     |     |     |     |     |     |     |     |

|     |     |     |     |     |     |     |     |     |     |     |   |     |     |     |     |     |     |     |     |     |
|-----|-----|-----|-----|-----|-----|-----|-----|-----|-----|-----|---|-----|-----|-----|-----|-----|-----|-----|-----|-----|
| C/C | A/A | T/T | G/G | C/C | T/T | -/- | T/T | C/C | G/G | A/A | - | G/G | C/C | A/A | T/T | A/A | T/T | A/A | C/C | C/C |
| C/C | A/A | T/T | G/G | C/C | T/T | -/- | T/T | C/C | G/G | A/A | - | G/G |     |     | T/T | A/A | T/T | A/A | C/C | C/C |
| C/C | A/A | T/T | G/G | C/C | T/T | -/- | T/T | C/C | G/G | A/A | - | G/G |     |     |     |     |     |     |     |     |
| C/C | A/A | T/T | G/G | C/C | T/T | -/- | T/T | C/C | G/G | A/A | - | G/G |     |     |     |     |     |     |     |     |
| C/C | A/A | T/T | G/G | C/C | T/T | -/- | T/T | C/C | G/G | A/A | - | G/G | C/C | A/A | T/T | A/A | T/T | A/A | C/C | C/C |
| C/C | A/A | T/T | G/G | C/C | T/T | -/- | T/T | C/C | G/G | A/A | - | G/G | C/C | A/A | T/T | A/A | T/T | A/A | C/C | C/C |
| C/C | A/A | T/T | G/G | C/C | T/T | -/- | T/T | C/C | G/G | A/G | - | G/G | C/C | A/A | T/T | A/A | T/T | A/A | C/C | C/C |
| C/C | A/A | T/T | G/G | C/C | T/T | -/- | T/T | C/C | G/G | A/G | - | G/G | C/C | A/A | T/T | A/A | T/T | A/A | C/C | C/C |
| C/C | A/A | T/T | G/G | C/C | T/T | -/- | T/T | C/C | G/G | A/G | - | G/G | C/C | A/A | T/T | A/A | T/T | A/A | C/T | C/C |
| C/C | A/A | T/T | G/G | C/C | T/T | -/- | T/T | C/C | G/G | A/A | - | G/G | C/C | A/A | T/T | A/A | T/T | A/A | C/C | C/C |
| C/C | A/A | T/T | G/G | C/C | T/T | -/- | T/T | C/C | G/G | A/G | - | G/G | C/C | A/A | T/T | A/A | T/T | A/A | C/T | C/C |
| C/C | A/A | T/T | G/G | C/C | T/T | -/- | T/T | C/C | G/G | A/G | - | G/G | C/C | A/A | T/T | A/A | T/T | A/A | C/C | C/C |
| C/C | A/A | T/T | G/G | C/C | T/T | -/- | T/T | C/C | G/G | A/A | - | G/G | C/C | A/A | T/T | A/A | T/T | A/A | C/C | C/C |
| C/C | A/A | T/T | G/G | C/C | T/T | -/- | T/T | C/C | G/G | A/G | - | G/G | C/C | A/A | T/T | A/A | T/T | A/A | C/T | C/C |
| C/C | A/A | T/T | G/G | C/C | T/T | -/- | T/T | C/C | G/G | A/G | - | G/G | C/C | A/A | T/T | A/A | T/T | A/A | C/T | C/C |
| C/C | A/A | T/T | G/G | C/C | T/T | -/- | T/T | C/C | G/G | A/G | - | G/G |     |     |     |     |     |     |     |     |
| C/C | A/A | T/T | G/G | C/C | T/T | -/- | T/T | C/C | G/G | G/G | - | G/G | C/C | A/A | T/T | A/A | T/T | A/A | T/T | C/C |
| C/C | A/A | T/T | G/G | C/C | T/T | -/- | T/T | C/C | G/G | G/G | - | G/G | C/C | A/A | T/T | A/A | T/T | A/A | C/C | C/C |

---

|     |     |     |     |     |     |     |     |     |     |     |     |     |     |     |     |     |     |     |     |     |
|-----|-----|-----|-----|-----|-----|-----|-----|-----|-----|-----|-----|-----|-----|-----|-----|-----|-----|-----|-----|-----|
| C/C | A/G | T/T | A/G | C/T | C/T | +/- | N/A | N/A | N/A | N/A | N/A | N/A | C/G | A/C | C/T | A/G | A/T | A/G | C/T | A/C |
| C/C | A/G | C/T | A/G | C/C | C/T | +/- | N/A | N/A | N/A | N/A | N/A | N/A | C/G | A/C | C/T | A/G | A/T | A/G | C/T | A/C |
| C/C | A/G | T/T | A/G | C/T | C/T | +/- | N/A | N/A | N/A | N/A | N/A | N/A | C/G | A/C | C/T | A/G | A/T | A/G | C/T | A/C |
| C/C | A/G | C/T | A/G | C/C | C/T | +/- | N/A | N/A | N/A | N/A | N/A | N/A | C/G | A/C | C/T | A/G | A/T | A/G | C/C | A/C |
| C/C | G/G | C/T | A/A | C/T | C/C | +/+ | C/C | T/T | T/T | G/G | +   | A/A | G/G | ?   | C/C | G/G | A/A | G/G | C/C | A/A |
| C/C | G/G | C/T | A/A | C/T | C/C | +/+ | C/C | C/C | T/T | G/G | +   | A/A | G/G | C/C | C/C | G/G | A/A | G/G | C/C | A/A |

---

---

Intron 4

| c.408+9 | c.408+15_408+16 | c.408+21 | c.408+36 | c.408+38 | c.408+45   | c.408+50 | c.408+67 | c.408+71 | c.408+78+122      | c.408+80_4 del | c.408+122 | c.408+131 | c.408+132 | c.408+137 |
|---------|-----------------|----------|----------|----------|------------|----------|----------|----------|-------------------|----------------|-----------|-----------|-----------|-----------|
| A>G     | delA            | G>A      | G>A      | A>C      | 5 T>G or A | 50 G>C   | 7 G>A    | 1 G>A    | 42bp <sup>s</sup> | C>T            | C>T       | C>T       | G>A       | G>T       |

|     |     |     |     |     |     |     |     |     |     |     |     |     |     |
|-----|-----|-----|-----|-----|-----|-----|-----|-----|-----|-----|-----|-----|-----|
| G/G | +/+ | A/A | A/A | C/C | A/A | G/G | G/G | A/A | +/+ | T/T | C/C | G/G | T/T |
| G/G | +/+ | A/A | A/A | C/C | T/T | G/G | G/G | A/A | +/+ | T/T | C/C | G/G | T/T |
| G/G | +/+ | A/A | A/A | C/C | T/T | G/G | G/G | A/A | +/+ | T/T | C/C | G/G | T/T |
| G/G | +/+ | A/A | A/A | C/C | T/T | G/G | G/G | A/A | +/+ | T/T | C/C | G/G | T/T |
| G/G | +/+ | A/A | A/A | C/C | T/T | G/G | G/G | A/A | +/+ | T/T | C/C | G/G | T/T |
| A/A | -/- | G/G | G/G | C/C | G/G | C/C | G/G | A/A | +/+ | T/C | C/C | A/G | G/G |
| A/A | -/- | G/G | G/G | C/C | G/G | C/C | A/A | A/A | +/+ | T/C | C/C | A/G | G/G |

|     |     |     |     |     |     |     |     |     |     |     |     |     |     |
|-----|-----|-----|-----|-----|-----|-----|-----|-----|-----|-----|-----|-----|-----|
| A/A | -/- | G/G | G/G | A/A | T/T | G/G | G/G | G/G | -/- | C/C | C/C | G/G | G/G |
| A/A | -/- | G/G | G/G | A/A | T/T | G/G | G/G | G/G | -/- | C/C | C/C | G/G | G/G |
| A/A | -/- | G/G | G/G | A/A | T/T | G/G | G/G | G/G | -/- | C/C | C/C | G/G | G/G |



|       |     |     |     |     |     |  |     |     |     |     |     |     |
|-------|-----|-----|-----|-----|-----|--|-----|-----|-----|-----|-----|-----|
| A/G   | +/- | N/A | N/A | N/A | N/A |  | N/A | N/A | N/A | N/A |     | N/A |
| A/A   | -/- | G/G | G/G | A/A | T/T |  | G/G | -/- | C/C | C/C |     | G/G |
| A/A   | -/- | G/G | G/G | A/A | T/T |  | G/G | -/- | C/T | C/C | A/G | G/G |
| A/A   | -/- | G/G | G/G | A/A | T/T |  | G/G | -/- | C/T | C/C | A/G | G/G |
| A/A   | -/- | G/G | G/G | A/A | T/T |  | G/G | -/- | C/T | C/C | A/G | G/G |
| G/G   | +   | A/A | A/A | C/C | T/A |  | A/A | ++  | C/T | C/T |     | T/T |
| A/A   | -   | G/G | G/G | A/A | T/T |  | G/G | -/- | C/C | C/C |     | G/G |
| <hr/> |     |     |     |     |     |  |     |     |     |     |     |     |
| A/A   | -/- | G/G | G/G | A/A | T/T |  | G/G | -/- | C/C | C/C |     | G/G |
| A/A   | -/- | G/G | G/G | A/A | T/T |  | G/G | -/- | C/T | C/C | A/G | G/G |
| A/A   | -/- | G/G | G/G | A/A | T/T |  | G/G | -/- | C/C | C/C |     | G/G |
| <hr/> |     |     |     |     |     |  |     |     |     |     |     |     |

|     |     |     |     |     |     |     |     |     |     |     |
|-----|-----|-----|-----|-----|-----|-----|-----|-----|-----|-----|
| A/A | -/- | G/G | G/G | A/A | T/T | G/G | -/- | C/C | C/C | G/G |
| A/A | -/- | G/G | G/G | A/A | T/T | G/G | -/- | C/C | C/C | G/G |

|     |     |     |     |     |     |     |     |     |     |     |     |
|-----|-----|-----|-----|-----|-----|-----|-----|-----|-----|-----|-----|
| A/A | -/- | G/G | G/G | A/A | T/T | G/G | -/- | C/C | C/C | G/G |     |
| A/A | -/- | G/G | G/G | A/A | T/T | G/G | -/- | C/C | C/C | G/G |     |
| A/A | -/- | G/G | G/G | A/A | T/T | G/G | -/- | C/C | C/C | G/G |     |
| A/A | -/- | G/G | G/G | A/A | T/T | G/G | -/- | C/C | C/C | G/G |     |
| A/A | -/- | G/G | G/G | A/A | T/T | G/G | -/- | C/C | C/C | G/G |     |
| A/A | -/- | G/G | G/G | A/A | T/T | G/G | -/- | C/C | C/C | G/G |     |
| A/A | -/- | G/G | G/G | A/A | T/T | G/G | -/- | C/C | N/A | N/A |     |
| A/A | -/- | G/G | G/G | A/A | T/T | G/G | -/- | C/C | C/C | G/G |     |
| A/A | -/- | G/G | G/G | A/A | T/T | G/G | -/- | C/C | C/C | G/G |     |
| A/A | -/- | G/G | G/G | A/A | T/T | G/G | -/- | C/T | C/C | A/G | G/G |

|     |     |     |     |     |     |     |     |     |     |     |
|-----|-----|-----|-----|-----|-----|-----|-----|-----|-----|-----|
| A/A | -/- | G/G | G/G | A/A | T/T | G/G | -/- | C/C | C/C | G/G |
| A/A | -/- | G/G | G/G | A/A | T/T | G/G | -/- | C/C | C/C | G/G |



|     |     |     |     |     |     |     |     |     |     |     |
|-----|-----|-----|-----|-----|-----|-----|-----|-----|-----|-----|
| A/G | +/- | N/A |
| A/G | +/- | N/A |
| A/G | +/- | N/A |
| A/G | +/- | N/A |
| G/G | +   | A/A | A/A | C/C | T/A | A/A | +/+ | C/T | C/T | T/T |
| G/G | +/+ | A/A | A/A | C/C | T/A | A/A | +/+ | T/T | C/C | T/T |

---

---

Table S2: Primers for analysis of *ASIP* in hybrid cats and wild felids.

| Exon | Exon size (bp) | Product size (bp) | Primer sequence 5'→3'                                                                                                 |
|------|----------------|-------------------|-----------------------------------------------------------------------------------------------------------------------|
| 2    | 160            | 462               | F: CCAGCCCAAAGAGATACAAGG<br>R: CTGCTTATTAGACTGGTGGTATGC                                                               |
| 2    | 160            | 237               | F <sup>4</sup> : GAATATCCTCCGCCTACTCCTG<br>R <sup>4</sup> : GGGAGCACGTTTGACATCTT                                      |
| 3    | 62             | 464               | F: CACACCCTGAGATTTCTGG<br>R: GCAATAACAGAGGTCTAGGAAACA                                                                 |
| 4    | 186            | 495               | F <sup>1</sup> : CCAAGGCTGAGGTGAAGAGG<br>R1 <sup>1</sup> : AAGCCCCGCCTCCTGAAA<br>R2 <sup>2</sup> : GAGAGCCCCACCCTACCC |
| 4    | 186            | 280               | F <sup>3</sup> : AGAGTTCCCAAGGCTGAGGT<br>R1 <sup>3</sup> : GCCTTGGAGGTGGGTGA<br>R2 <sup>2,3</sup> : GGCCTGGAGGCGGGTGA |

<sup>1</sup>Primers obtained from previously published study (Eizirik *et al.* 2003). <sup>2</sup>Primer specific for the Asian leopard cat allele. <sup>3</sup>Primers used for sequencing exon 4. <sup>4</sup>Primers used to amplify exon 2 from European samples with unique allele "A2".

Table S3. Pyrosequencing primers for *ASIP* analysis.

| <i>ASIP</i> Variant | Amplicon  |                                                                                                    |
|---------------------|-----------|----------------------------------------------------------------------------------------------------|
|                     | Size (bp) | Primers                                                                                            |
| Indel and A127G     | 105       | F: Biotin TGAGGAAAAACCCAGAGATGAC<br>R: GGGGTCAAGCTGGGCTACTTA<br>Seq: ATAGAGACAGAAGRGAGATCCAACAT    |
| T142C               | 105       | F: Biotin TGAGGAAAAACCCAGAGATGAC<br>R: GGGGTCAAGCTGGGCTACTTA<br>Seq: GGGCTACTTACCTACWATAGAGACAGAAG |
| G41C                | 62        | F: Biotin TGGCCACCCTGCTGGTCT<br>R: TTCCTCAGGTGCCAGGTGAC<br>Seq: GTAGGCAGTGAGGAGGCACAG              |
